# Supplementary material for: Nanofiber formation from sequence-selective DNA-templated self-assembly of a thymidylic acid-appended bolaamphiphile
Source: Royal Society of Chemistry journal article supplement (doi:10.1039/b813592d), 2008-01-01
Supplement: b813592d.pdf [file b813592d.pdf]

*Supporting Information*

**Nanofiber formation from sequence-selective DNA-templated self-assembly of a thymidylic acid-appended bolaamphiphile**

Rika Iwaura,<sup>\*, a, b</sup> Mayumi Ohnishi-Kameyama,<sup>a</sup> and Toshimi Shimizu<sup>\*, c, d</sup>

<sup>a</sup>*National Food Research Institute (NFRI), National Agriculture and Food Research Organization (NARO), 2-1-12 Kannondai, Tsukuba, Ibaraki, 305-8642, Japan*

<sup>b</sup>*Precursory Research for Embryonic Science and Technology (PRESTO), Japan Science and Technology Agency (JST), 4-1-8 Honcho Kawaguchi, Saitama, 332-0012, Japan*

<sup>c</sup>*Nanotube Research Center (NTRC), National Institute of Advanced Industrial Science and Technology (AIST), Tsukuba Central 5, 1-1-1 Higashi, Tsukuba, Ibaraki 305-8565, Japan*

<sup>d</sup>*Solution Oriented Research for Science and Technology (SORST), Japan Science and Technology Agency (JST), Tsukuba Central 5, 1-1-1 Higashi, Tsukuba, Ibaraki, 305-8565, Japan*

*\*Corresponding authors. Iwaura: E-mail: riwaura@affrc.go.jp; Tel: +81 29 838 7089; Fax: +81 29 838 7996. Shimizu: E-mail: tshzmz-shimizu@aist.go.jp; Tel: +81 29 861 4544; Fax: +81 29 861 4545.*

## Sample Preparation

Thymidylic acid-appended bolaamphiphile **1** was synthesized by the phosphoramidite technique described with its stereochemistry in reference 10. Synthetic oligonucleotides **2**, **3**, **4**, and **5** were purchased from Fasmac Co (Kanagawa, Japan). Bolaamphiphile **1** was dissolved in a 0.1× TE buffer solution (1.0 mM tris-HCl and 0.1 mM EDTA, pH = 8.0) by sonication and heating at 90 °C for 30 min. Templates **2** and **3** were added to the solution and the solution was divided into three portions and gradually cooled to room temperature to form whitish viscous solutions. Solutions of either the target oligonucleotide (**4**) or a non-target oligonucleotide (**5**) in 0.1× TE buffer were added to each of two portions, and no oligonucleotide was added to the third portion. These three portions were kept at 20 °C for one day prior to analysis. The final concentrations of bolaamphiphile **1** and oligonucleotides **2**, **3**, **4**, and **5** were  $1.8 \times 10^{-2}$  M,  $9.0 \times 10^{-4}$  M,  $9.0 \times 10^{-4}$  M,  $1 \times 10^{-4}$  M, and  $1 \times 10^{-4}$  M, respectively.

## AFM Observation

One microliter of each aqueous solution was placed on highly oriented pyrolytic graphite and dried in air for a few minutes. The specimen was then washed with 10  $\mu$ l of cold Millipore water 2 times and blotted with filter paper. Tapping-mode AFM was

carried out with a Nanonavi station and an S-image system (SII NanoTechnology Inc., Tokyo, Japan) using a silicon micro-cantilever (spring constant  $40 \text{ N m}^{-1}$ , frequency  $\approx 120 \text{ kHz}$ , Olympus).

### **UV melting curve measurements**

Solutions of **1** alone, **1/2/3/4**, **1/2/3**, and **2/3/4** were prepared in  $0.1\times$  TE buffer using the similar procedure described in sample preparation and subjected to UV melting experiments in a quartz cell ( $l = 1.0 \text{ cm}$ ). The concentrations of **1**, **2**, **3**, and **4** were  $3.6 \times 10^{-5} \text{ M}$ ,  $1.8 \times 10^{-6} \text{ M}$ ,  $1.8 \times 10^{-6} \text{ M}$ , and  $2 \times 10^{-7} \text{ M}$ , respectively. The UV absorbance at  $260 \text{ nm}$  was measured with a UV-1800 spectrometer (Shimadzu Co., Kyoto, Japan) at a heating rate of  $0.5 \text{ degC min}^{-1}$  after annealing at  $10 \text{ }^\circ\text{C}$  for 30 minutes, and  $T_m$  analyses were conducted using a TMSPC-8 system (Shimadzu Co., Kyoto, Japan).  $T_m$  values were calculated from the first-derivative curves of the UV melting curve measurements as shown in Figure S1. The UV melting curve of the **1/2/3/5** system was obtained by the similar procedure described above and  $T_m$  was appeared at  $57 \text{ }^\circ\text{C}$  as shown in Figure S2.

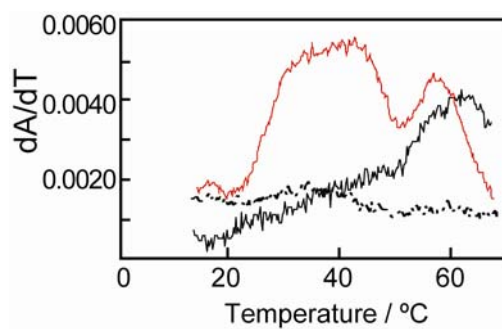

Figure S1 The first-derivative curves of the UV melting curves shown in Figure 3 for the **1/2/3/4** (red), **1/2/3** (black), and **2/3/4** (dotted) systems.

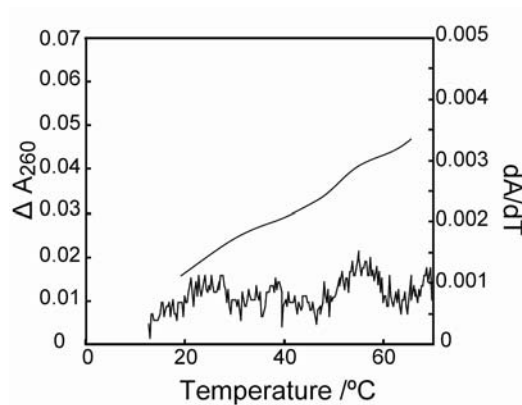

Figure S2 The melting and first-derivative curves of the **1/2/3/5** system in  $0.1\times$  TE buffer solution.
